# Supplementary material for: Effects of insecticides on mortality, growth and bioaccumulation in black soldier fly (Hermetia illucens) larvae
Source: PLOS journal article supplement (doi:10.1371/journal.pone.0249362), 2021-04-21
Supplement: S2 (10.1371/journal.pone.0249362.s002) [file journal.pone.0249362.s002]

**S2 Table. Quality control results analytical procedure for Exp. 1: substrate.**

| <b>Exp. 1 (1*MRL)</b> |                         |                         |          |                            |
|-----------------------|-------------------------|-------------------------|----------|----------------------------|
| <b>Substance name</b> | <b>Average recovery</b> | <b>RSD <sup>a</sup></b> | <b>n</b> | <b>Spike range (mg/kg)</b> |
| Chlorpyrifos          | 101%                    | 19%                     | 3        | 0.005-0.10                 |
| Cypermethrin          | 91%                     | 0.4%                    | 2        | 0.05-0.10                  |
| Imidacloprid          | 86%                     | 26%                     | 3        | 0.005-0.10                 |
| PBO                   | 115%                    | 6.8%                    | 2        | 0.005-0.10                 |
| Propoxur              | 138%                    | 2.3%                    | 3        | 0.005-0.10                 |
| Spinosad              | 85%                     | 7.6%                    | 3        | 0.005-0.10                 |
| Tebufenozide          | 89%                     | 7.8%                    | 3        | 0.005-0.10                 |

Legend: a: relative standard deviation.
