# Supplementary material for: Effects of insecticides on mortality, growth and bioaccumulation in black soldier fly (Hermetia illucens) larvae
Source: PLOS journal article supplement (doi:10.1371/journal.pone.0249362), 2021-04-21
Supplement: S5 (10.1371/journal.pone.0249362.s005) [file journal.pone.0249362.s005]

**S5 Table. Overview of results for survival (n, number of larvae surviving) and increase in biomass (g) of black soldier fly larvae (*Hermetia illucens*) for Exp. 1 and Exp. 2. Mean and standard deviation.**

| Substance<br>name(s) | Survival (n)      |                     | Increase in biomass (g) |                     |
|----------------------|-------------------|---------------------|-------------------------|---------------------|
|                      | Exp. 1<br>(1*MRL) | Exp. 2<br>(+/-*MRL) | Exp. 1<br>(1*MRL)       | Exp. 2<br>(+/-*MRL) |
| Control (blank)      | 100.0 ± 0         | -                   | 11.1 ± 0.3              | -                   |
| Control + MeOH       | 98.7 ± 0.6        | 99.0 ± 1.7          | 10.8 ± 0.3              | 11.0 ± 0.3          |
| Control + ACN        | 99.7 ± 0.6        | 99.0 ± 1.0          | 10.8 ± 0.4              | 11.3 ± 0.5          |
| Chlorpyrifos         | 99.3 ± 1.2        | 97.0 ± 2.6          | 10.9 ± 0.2              | 11.1 ± 1.0          |
| Propoxur             | 97.3 ± 3.1        | 99.3 ± 0.6          | 10.6 ± 0.3              | 11.0 ± 0.1          |
| Imidacloprid         | 99.3 ± 0.6        | 100.0 ± 0.0         | 13.0 ± 0.2              | 12.3 ± 0.6          |
| Spinosad             | 38.3 ± 10.8       | 98.3 ± 2.9          | 3.4 ± 1.0               | 11.2 ± 0.3          |
| Tebufenozide         | 99.3 ± 1.2        | 99.3 ± 0.6          | 10.9 ± 0.1              | 11.2 ± 0.6          |
| Cypermethrin         | 87.3 ± 4.0        | 97.7 ± 3.2          | 8.2 ± 0.4               | 10.5 ± 0.1          |
| Piperonyl butoxide   | 98.7 ± 1.2        | 99.7 ± 0.6          | 10.9 ± 0.0              | 11.8 ± 0.4          |
| Cyperm. + PBO        | 77.7 ± 2.5        | 100.0 ± 0.0         | 4.5 ± 0.5               | 11.2 ± 0.7          |
