# Supplementary material for: Effects of insecticides on mortality, growth and bioaccumulation in black soldier fly (Hermetia illucens) larvae
Source: PLOS journal article supplement (doi:10.1371/journal.pone.0249362), 2021-04-21
Supplement: S6 (10.1371/journal.pone.0249362.s006) [file journal.pone.0249362.s006]

**S6 Table. Analysed concentrations of the compounds in substrate, larvae and residual material (consisting of larval excreta + residual feed) in Exp. 1 (mg/kg). Mean and standard deviation (n = 3).**

| <b>Substance name(s)</b>             | <b>Analysed concentration in substrate (mg/kg)</b> | <b>Analysed concentration larvae (mg/kg)</b> | <b>Analysed concentration residual material (mg/kg)</b> |
|--------------------------------------|----------------------------------------------------|----------------------------------------------|---------------------------------------------------------|
| Chlorpyrifos                         | 0.03                                               | POS (<0.005)                                 | 0.034 ± 0.004                                           |
| Propoxur                             | 0.05                                               | <LOQ (0.001)                                 | 0.017 ± 0.007                                           |
| Imidacloprid                         | 0.1                                                | POS (<0.005)                                 | 0.036 ± 0.005                                           |
| Spinosad                             | 1.4                                                | 0.122 [1]                                    | 1.731 ± 0.234                                           |
| Tebufenozide                         | 0.05                                               | POS (<0.001)                                 | 0.020 ± 0.004                                           |
| Cypermethrin                         | 0.2                                                | 0.118 ± 0.018                                | 0.927 ± 0.047                                           |
| Piperonyl butoxide                   | 6.3                                                | 0.026 ± 0.004                                | 1.764 ± 0.136                                           |
| Cypermethrin +<br>Piperonyl butoxide | 0.3<br>5.6                                         | 0.043 ± 0.008<br>0.065 ± 0.024               | 0.758 [1]<br>8.654 ± 0.724                              |

*<LOQ: below level of quantification (LOQ value indicated in brackets).*

*POS: positive value for the concentration, but could not be quantified (LOQ value indicated in brackets).*

[1] Mean of two values.
