# Supplementary material for: Effects of insecticides on mortality, growth and bioaccumulation in black soldier fly (Hermetia illucens) larvae
Source: PLOS journal article supplement (doi:10.1371/journal.pone.0249362), 2021-04-21
Supplement: S7 (10.1371/journal.pone.0249362.s007) [file journal.pone.0249362.s007]

**S7 Table. Analysed concentrations of compounds in larvae and residual material (consisting of larval excreta + residual feed) and spiked concentrations in substrate in Exp. 2 (mg/kg). Mean and standard deviation (n = 3).**

| <b>Substance name(s)</b>             | <b>Spiked concentration in feed (mg/kg)</b> | <b>Analysed concentration larvae (mg/kg)</b> | <b>Analysed concentration residual material (mg/kg)</b> |
|--------------------------------------|---------------------------------------------|----------------------------------------------|---------------------------------------------------------|
| Chlorpyrifos                         | 0.5                                         | 0.012 ± 0.005                                | 0.153 ± 0.068                                           |
| Propoxur                             | 0.5                                         | POS (<0.001)                                 | 0.036 ± 0.006                                           |
| Imidacloprid                         | 1.0                                         | 0.007 ± 0.001                                | 0.446 ± 0.081                                           |
| Spinosad                             | 0.2                                         | 0.005 ± 0.002                                | 0.099 ± 0.027                                           |
| Tebufenozide                         | 0.5                                         | 0.005 ± 0.001                                | 0.066 ± 0.010                                           |
| Cypermethrin                         | 0.1                                         | 0.079 ± 0.025                                | - [1]                                                   |
| Piperonyl butoxide                   | 2.0                                         | 0.019 ± 0.007                                | 0.375 ± 0.050                                           |
| Cypermethrin +<br>Piperonyl butoxide | 0.1<br>2.0                                  | 0.052 ± 0.019<br>0.021 ± 0.001               | 0.095 ± 0.020<br>0.428 ± 0.049                          |

[1]: Due to a dilution error in sample preparation, the cypermethrin concentration in the excreta in Exp. 2 could not be quantified.

POS: positive value for the concentration but could not be quantified (LOQ value indicated in brackets).
